# Supplementary material
Source: PubMed Central journal article supplement (PMC1913783)
Supplement: plntphys_pp.106.093997_1.pdf [file plntphys_pp.106.093997_1.pdf]

## Transcript Profiling of the Anoxic Rice Coleoptile

Rasika Lasanthy-Kudahettige, Leonardo Magneschi, Elena Loreti, Silvia Gonzali, Francesco Licausi, Giacomo Novi, Amedeo Alpi, Pierdomenico Perata

### The MIAME Checklist

#### *Experiment Design:*

1. Type of experiment:
  - Comparison of control (aerobic) vs. anoxic rice coleoptiles
2. Experimental factors:
  - anoxia
3. The number of hybridizations performed in the experiment: 4
4. Hybridization design:

|   |                                      | Experiment | Experimental condition |
|---|--------------------------------------|------------|------------------------|
| 1 | <i>Oryza sativa</i> , CV. Nipponbare | 1          | air                    |
| 2 | <i>Oryza sativa</i> , CV. Nipponbare | 2          | anoxia                 |
| 3 | <i>Oryza sativa</i> , CV. Nipponbare | 1          | air                    |
| 4 | <i>Oryza sativa</i> , CV. Nipponbare | 2          | anoxia                 |

5. Quality control steps taken: Electrophoresis of fragmented cRNA

#### *Samples used, extract preparation and labeling:*

1. Biological sample:
  - Coleoptiles from *Oryza sativa*, CV. Nipponbare
2. Manipulation of biological samples and protocols used:

- *Oryza sativa*, CV. Nipponbare grown in a growth chamber controlled at 28°C; germination for 4 days in the darkness since the imbibition of the seeds; Four days after germination, both the anoxic and the aerobic coleoptiles are close to their maximal length, and the aerobic coleoptile is large enough to allow a fast and clean removal of the primary leaf, avoiding the extraction of leaf mRNA that would otherwise contaminate coleoptile mRNA preparations.
- ONLY coleoptile tissue was used for the microarray experiment
- Darkness
- Sterile culture
- Water used as a medium

### 3. Protocol for preparing the hybridization extract:

- RNA extraction with Ambion RNAqueous extraction kit (Ambion, Austin, Texas USA)

### 4. Labeling protocols:

- First strand cDNA synthesis from 10 micrograms of total RNA using Ambion MessageAmp kit (Ambion, Austin, Texas USA)
- Double strand cDNA synthesis using Ambion MessageAmp kit (Ambion, Austin, Texas USA)
- Synthesis of biotin-labeled cRNA using Ambion MessageAmp kit (Ambion, Austin, Texas USA)
- Purify labeled cRNA with Ambion MessageAmp kit (Ambion, Austin, Texas USA)
- Fragmentation of labeled cRNA. 94°C, 35 min in Fragmentation Buffer (40 mM Tris acetate pH8.1, 100mM potassium acetate, 30mM magnesium acetate).
- 

### *Hybridization procedures and parameters:*

#### 1. Hybridization of fragmented cRNA to Arabidopsis Genome GeneChip array (Affymetrix)

- 45°C, 16 hr hybridization in a Hybridization Oven model 640 (Affymetrix)
- Hybridization Cocktail:
  - 50 µg/mL fragmented cRNA
  - 100 mM MES, 1M[Na<sup>+</sup>]
  - 20 mM EDTA, 0.01% Tween20 (Pierce, Rockford, IL)
  - 1X GeneChip Hybridization Control (Affymetrix)
  - 50 pM Control Oligonucleotide B2 (Affymetrix)

- 0.5 mg/mL acetylated BSA (Invitrogen)
  - mg/mL herring sperm DNA (Promega, Madison WI)
  -
2. Washing and staining in a GeneChip Fluidics Station model 400 (Affymetrix)
- Wash Buffer A:
  - 6X SSPE
  - 0.01% Tween 20 (Pierce)
  - Wash Buffer B:
  - 100 mM MES, 1M[Na+]
  - 0.01% Tween 20 (Pierce)
  - SAPE solution:
  - 100 mM MES, 1M[Na+]
  - 0.05% Tween 20 (Pierce)
  - 2 mg/mL acetylated BSA (Invitrogen)
  - 10 µg/mL streptavidin phycoerythrin (Molecular Probes, Eugene, OR)
  - Antibody solution:
  - 100 mM MES, 1M[Na+]
  - 0.05% Tween 20 (Pierce)
  - 0.005% Antifoam 0-30 (Sigma)
  - 2 mg/mL acetylated BSA (Invitrogen)
  - 0.1 mg/mL goat IgG (Sigma)
  - 3 µg/mL biotinylated anti-streptavidin antibody (Vector Laboratories, Burlingame,CA)
  - 
  - 10 cycles of 2 mixes/cycle with Wash Buffer A at 25°C
  - 4 cycles of 15 mixes/cycle with Wash Buffer B at 50°C
  - Stain the probe array for 10 min in SAPE solution at 25°C
  - 10 cycles of 4 mixes/cycle with Wash Buffer A at 25°C
  - Stain the probe array for 10 min in antibody solution at 25°C
  - Stain the probe array for 10 min in SAPE solution at 25°C
  - 15 cycles of 4 mixes/cycle with Wash Buffer A at 30°C
  -

*Measurement data and specifications:*

1. Scanning: GeneArray™ scanner manufactured by Hewlett-Packard  
<http://www.affymetrix.com/products/instruments/specific/completeinst.affx>
2. Image analysis: Microarray Suite 5.0 (Affymetrix)
3. Microarray analysis was performed using R/Bioconductor (Gentlemen *et al.*, 2004). Expression measures were obtained using GCRMA (Wu and Irizarry, 2005), a multiarray analysis method estimating probesets signals taking into account the physical affinities between probes and targets. Normalization was done by a quantiles method (Bolstad *et al.*, 2003). To reduce the number of non informative genes, two different filters were applied: the first removes the probesets presenting an Affymetrix Absent Call (A) for both the conditions; the second eliminates the probesets showing, as maximum signal in the two conditions, a value equal or less than the 95th percentile of the overall Absent calls signals distribution. This filtering yielded 21484 probesets. To identify a statistically reliable number of differentially expressed genes among the two conditions, a linear model was performed (Wettenhall *et al.*, 2004). For assessing differential expression, an empirical Bayesian method (Smyth, 2004) was used to moderate the standard error of the estimated log-fold changes. In order to control p-values in a context of multiple testing problem, a Benjamini-Hochberg's correction of the false discovery rate (Reiner *et al.*, 2003) was applied (adjusted P-value  $\leq 0.01$ ) leading to 3134 differentially expressed probesets. Microarray datasets were deposited in a public repository with open access (accession no. GSE6908, <http://www.ncbi.nlm.nih.gov/projects/geo/>).

*Array Design:*

Arabidopsis Rice GeneChip array (Affymetrix)
