# Supplementary material
Source: PubMed Central journal article supplement (PMC1913783)
Supplement: plntphys_pp.106.093997_2.pdf [file plntphys_pp.106.093997_2.pdf]

**Table S4:** List of primers and Taqman probes used in Real Time PCR analysis

| <i>Gene</i>                           | <i>Description</i> | <i>5'-3' sequence</i>              |
|---------------------------------------|--------------------|------------------------------------|
| <i>Os08g03290</i><br><i>G3PDH</i>     | primer forward     | AGAATAAAACGTGGACGGTGTTC            |
|                                       | primer reverse     | TGCAACTCATTATCCCAACTAGCATT         |
|                                       | TaqMan probe       | TCAGGACCCACCCCCTCT                 |
| <i>Os03g60720</i><br><i>EXPA7</i>     | primer forward     | TGAAGCAAACACTGCAATATACCCTCTT       |
|                                       | primer reverse     | CCGAAGAAGAACCCAAACTTAACCA          |
|                                       | TaqMan probe       | AGCAGGTGTGTTTTT                    |
| <i>Os03g44290</i><br><i>EXPB12</i>    | primer forward     | CTCTGGCAAGGGATGTGGTT               |
|                                       | primer reverse     | GATACCAGAGCAAGCTTCATTACCA          |
|                                       | TaqMan probe       | ACACCACCCGGTAGCAC                  |
| <i>Os11g10480</i><br><i>ADH1</i>      | primer forward     | GCAAATTTCTGGCTTTGTCAATCAGTA        |
|                                       | primer reverse     | CGCCAAAAGATCACTGATTCTTAACAA        |
|                                       | TaqMan probe       | TTTGCAGCTACAGACACTG                |
| <i>Os11g10510</i><br><i>ADH2</i>      | primer forward     | CCCTCCTTTCATGGCTTGATCTT            |
|                                       | primer reverse     | AGGGTAAACTGGTGAAAATCTGCTA          |
|                                       | TaqMan probe       | CAATGCTGACAATAAAC                  |
| <i>Os08g36910</i><br><i>RAMY3D</i>    | primer forward     | GACTACAGCGTCTGGGAGAAG              |
|                                       | primer reverse     | TGTAGAAACTGGTTTGAGCATGACT          |
|                                       | TaqMan probe       | CTCAAGCCCTAAACTGAACG               |
| <i>Os02g52150</i><br><i>HSP20</i>     | primer forward     | GCGGATGGATCGTCTCCTTTTATC           |
|                                       | primer reverse     | TCCATAACTTCGAAAACAAAACAAAGCT       |
|                                       | TaqMan probe       | CAGCACGCCGCATT                     |
| <i>Os03g08460</i><br><i>OsERF#060</i> | primer forward     | GAGGCCACCTGGTCAGG                  |
|                                       | primer reverse     | TTCAGTTCAGCAAGATCGTCAGT            |
|                                       | TaqMan probe       | CAGGCCTCTTCTGCTCG                  |
| <i>Os07g47790</i><br><i>OsERF#067</i> | primer forward     | GCCGTGCCGATGTGAGAT                 |
|                                       | primer reverse     | TGAACTTTTTTTTGTTTCTGCTGTGAAGA      |
|                                       | TaqMan probe       | ATGAGCTAGCATCGATCTGA               |
| <i>Os01g21120</i><br><i>OsERF#068</i> | primer forward     | TCTGGCCTTCGAAGACTACGA              |
|                                       | primer reverse     | TGGTACTTACTACGGGTAGGGAAA           |
|                                       | TaqMan probe       | ACATTTTACTAGAGCGCTAGCGAG           |
| <i>Os02g02400</i><br><i>CATALASE</i>  | primer forward     | TGATCATCAGCAAGGCTACAGAAAT          |
|                                       | primer reverse     | AGTGGCATTAAATACGCCAGTACATTA        |
|                                       | TaqMan probe       | CATTTTGGTTTCTTTTAATTTATC           |
| <i>Os11g47560</i><br><i>XIP</i>       | primer forward     | GGGTACATGTTCCAGAAGGATCTCT          |
|                                       | primer reverse     | TGTCGTAGTACCTGTCCCAGATG            |
|                                       | TaqMan probe       | TCATCGACAAGGAGCCCAA                |
| <i>Os11g18570</i><br><i>P450</i>      | primer forward     | CAGACGTAACATACCTATGGGATATTCATCTATA |
|                                       | primer reverse     | CACACACACACATAAGAGGACCATAT         |
|                                       | TaqMan probe       | ATCCTACGGAGCTATTCGTAC              |
| <i>Os01g60770</i><br><i>EXPA2</i>     | primer forward     | AGGTGGTGTCTTGTAACCTTTTGTGTGA       |
|                                       | primer reverse     | ATGGTCCCAAAGCACAAGAGT              |
|                                       | TaqMan probe       | ACTCCTCCGGCCCATGTG                 |
| <i>Os05g39990</i><br><i>EXPA4</i>     | primer forward     | GGCTATGCTGAGGCTGCTAATT             |
|                                       | primer reverse     | CTCCCCTTACTACTACCACTACACT          |
|                                       | TaqMan probe       | TTTTCTTCTCTGGACTTCG                |
| Arabidopsis<br><i>UBQ10</i>           | primer forward     | CGTTAAGACGTTGACTGGGAAACT           |
|                                       | primer reverse     | GCTTTCACGTTATCAATGGTGTCA           |
|                                       | TaqMan probe       | CTCTCCACCTCCAAAGTG                 |
| <i>At1g72360</i>                      | primer forward     | ACACAATGGCTCGAAGATATCATCATG        |
|                                       | primer reverse     | ACGTTGTTGGCTTCTTCACTATCAT          |
|                                       | TaqMan probe       | ATGCGAATAAGAAACATGAACC             |

|                  |                |                           |
|------------------|----------------|---------------------------|
| <i>At2g47520</i> | primer forward | CCTGATGGCATTGGAGGATTACATG |
|                  | primer reverse | GGTCGCCGATTGGTCGT         |
|                  | TaqMan probe   | AACCGGAATCTGATAGAATC      |
| <i>At5g59720</i> | primer forward | CTTCAACCGCTCGTGATGTG      |
|                  | primer reverse | CCGGCGTTTCCTTCCAATC       |
|                  | TaqMan probe   | CACTCTTGCCTTTGTAAC        |
